# Supplementary material for: Estrogen Promotes Hepatic Synthesis of Long-Chain Polyunsaturated Fatty Acids by Regulating ELOVL5 at Post-Transcriptional Level in Laying Hens
Source: MDPI journal article supplement (doi:10.3390/ijms18071405), 2017-06-30
Supplement: s1 [file s1]

## Supplementary material

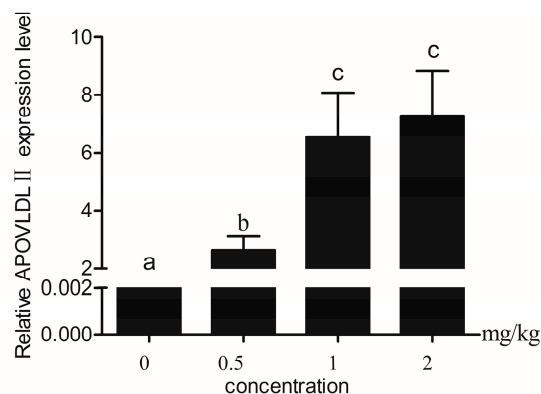

**Figure S1.** Expression level of *ApoVLDLII* mRNA in the liver of laying hens. The birds were injected intramuscularly with 0.5, 1, and 2 mg 17  $\beta$ -estradiol (dissolved in olive oil) per kg of body weight, or with the vehicle (the same amount of solvent olive oil).  $\beta$ -Actin was used as the referenced gene to estimate mRNA. Data are presented as Mean  $\pm$  SEM ( $n = 6$  for each group). Values with different superscripts indicate statistical difference ( $p < 0.05$ ).

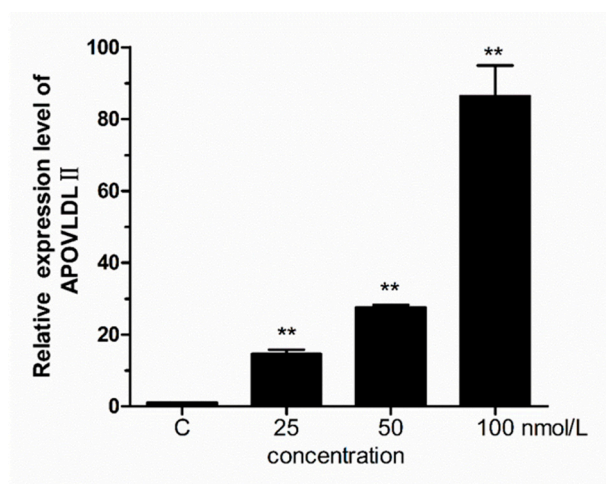

**Figure S2.** Expression level of *ApoVLDLII* mRNA in chicken primary hepatocytes. The cells were incubated with 25, 50, and 100 nM of 17  $\beta$ -estradiol, or vehicle (0.1% ethanol).  $\beta$ -Actin was used as the reference gene to estimate mRNA. Data are presented as Mean  $\pm$  SEM ( $n = 6$  for each group). \*  $p < 0.05$ , \*\*  $p < 0.01$ .

|                                     |                                    |                            |
|-------------------------------------|------------------------------------|----------------------------|
| Position 57-64 of ELOVL5 3' UTR     | 5' ... AUCAUCUGAUUGUAAAAGCACAA ... | 3' UGUACCAAUUAGUUCGUGUU    |
| <b>gga-miR-218-5p</b>               |                                    |                            |
| Position 271-277 of ELOVL5 3' UTR   | 5' ... AUACGACACUGCUGUUGCCUUA ...  | 3' ACCGUAAGUGACGC--ACGGAUU |
| <b>gga-miR-124b</b>                 |                                    |                            |
| Position 271-277 of ELOVL5 3' UTR   | 5' ... AUACGACACUGCUGUUGCCUUA ...  | 3' ACCGUAAGUGGCGC--ACGGAUU |
| <b>gga-miR-124a-3p</b>              |                                    |                            |
| Position 413-420 of ELOVL5 3' UTR   | 5' ... GUAGUAAAACACACA-UGCCUUA ... | 3' ACCGUAAGUGGCGCACGGAUU   |
| <b>gga-miR-124a-3p</b>              |                                    |                            |
| Position 413-420 of ELOVL5 3' UTR   | 5' ... GUAGUAAAACACACA-UGCCUUA ... | 3' ACCGUAAGUGACGCACGGAUU   |
| <b>gga-miR-124b</b>                 |                                    |                            |
| Position 1374-1381 of ELOVL5 3' UTR | 5' ... AUCUUUUUAAAAUUUUUUGCACA ... | 3' AGUCAAACGUAACCUAAACGUGU |
| <b>gga-miR-19b-3p</b>               |                                    |                            |
| Position 1374-1381 of ELOVL5 3' UTR | 5' ... AUCUUUUUAAAAUUUUUUGCACA ... | 3' AGUCAAACGUAUCUAAACGUGU  |
| <b>gga-miR-19a-3p</b>               |                                    |                            |
| Position 1460-1467 of ELOVL5 3' UTR | 5' ... AGACAGUGUCCGUCAGUUUACA ...  | 3' UCGACUCACAUCCU--ACAAUGU |
| <b>gga-miR-30c-5p</b>               |                                    |                            |
| Position 1460-1467 of ELOVL5 3' UTR | 5' ... AGACAGUGUCCGUCAGUUUACA ...  | 3' UCGACUCACAUCCU--ACAAUGU |
| <b>gga-miR-30b-5p</b>               |                                    |                            |
| Position 1460-1467 of ELOVL5 3' UTR | 5' ... AGACAGUGUCCGUCAGUUUACA ...  | 3' GGUCAGUCCUACAAUGU       |
| <b>gga-miR-30e-5p</b>               |                                    |                            |
| Position 1460-1467 of ELOVL5 3' UTR | 5' ... AGACAGUGUCCGUCAGUUUACA ...  | 3' GAAGGUCAGCUCCUACAAUGU   |
| <b>gga-miR-30a-5p</b>               |                                    |                            |
| Position 1460-1467 of ELOVL5 3' UTR | 5' ... AGACAGUGUCCGUCAGUUUACA ...  | 3' GAAGGUCAGCCCCUACAAUGU   |
| <b>gga-miR-30d</b>                  |                                    |                            |

**Figure S3.** The binding sites in the 3'UTRs of target gene *ELOVL5* complemented with seed regions of miRNAs.

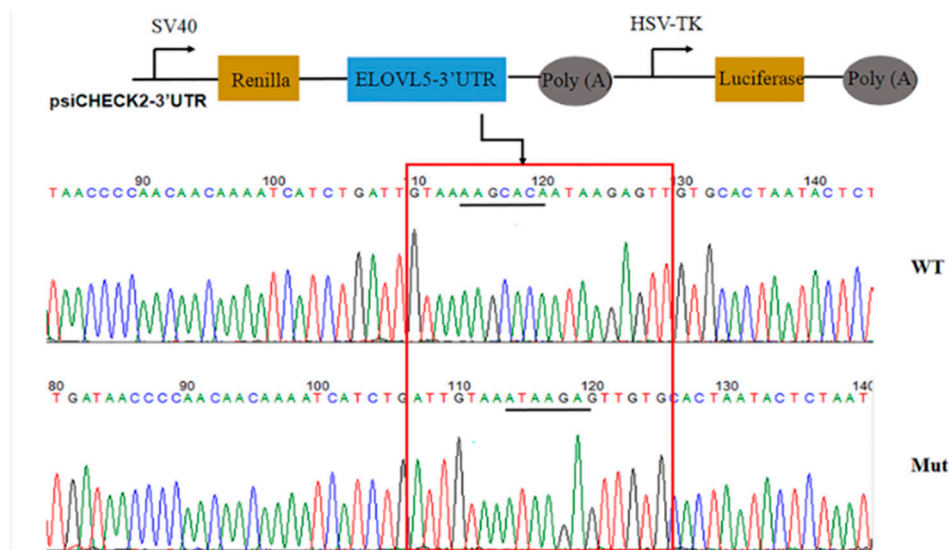

**Figure S4.** Construction and verification of plasmids. The 3'UTRs of target gene *ELOVL5* were cloned into psiCHECK-2 Dual Luciferase Reporter vectors for validation in vitro. WT, Wild type vector; Mut, Mutated vector.

**Table S1.** Downregulated miRNAs in the liver of peak-laying period hens.

| miRNA             | Fold Change (L20/L30) | FDR                |
|-------------------|-----------------------|--------------------|
| miR-146b-5p       | 8.5                   | 0                  |
| miR-24-3p         | 7.4                   | 1.696E-27          |
| miR-146a-5p       | 6.0                   | 3.81E-122          |
| miR-221-5p        | 5.8                   | 0.0244488          |
| miR-7b            | 5.4                   | 0.0001006          |
| miR-147           | 5.1                   | 0.0415756          |
| miR-106-5p        | 5.0                   | 0.088337           |
| miR-20a-5p        | 4.6                   | 4.977E-19          |
| miR-140-5p        | 4.6                   | 1.655E-08          |
| <b>miR-218-5p</b> | <b>4.3</b>            | <b>0.0385142</b>   |
| <b>miR-19b-3p</b> | <b>4.3</b>            | <b>3.687E-21</b>   |
| miR-33-3p         | 4.2                   | 6.707E-06          |
| miR-16c-5p        | 4.0                   | 0.000481           |
| miR-221-3p        | 4.0                   | 9.691E-12          |
| <b>miR-19a-3p</b> | <b>3.9</b>            | <b>6.599E-05</b>   |
| miR-16-5p         | 3.8                   | 1.116E-57          |
| miR-146c-5p       | 3.7                   | 0                  |
| miR-223           | 3.6                   | 6.169E-06          |
| miR-451           | 3.6                   | 2.422E-62          |
| miR-126-3p        | 3.6                   | 3.22E-115          |
| miR-10a-5p        | 3.5                   | 0                  |
| miR-142-3p        | 3.5                   | 3.956E-06          |
| miR-126-5p        | 3.4                   | 0                  |
| miR-17-5p         | 3.4                   | 1.676E-09          |
| miR-2188-5p       | 3.3                   | 1.092E-13          |
| miR-181a-3p       | 3.3                   | 0.0106489          |
| miR-23b-3p        | 3.3                   | 0.0388315          |
| miR-155           | 3.2                   | 0.0428774          |
| miR-193b-3p       | 3.2                   | 2.564E-19          |
| miR-200a-3p       | 3.2                   | 6.113E-06          |
| miR-21-3p         | 3.0                   | 0.0094551          |
| miR-122-3p        | 3.0                   | 9.133E-18          |
| miR-215-5p        | 2.9                   | 0.0104972          |
| <b>miR-30a-5p</b> | <b>1.7</b>            | <b>0.000341357</b> |
| miR-34a-5p        | 2.8                   | 0.0001375          |
| miR-21-5p         | 2.5                   | 0                  |
| miR-214           | 2.5                   | 0.0399318          |
| <b>miR-30e-5p</b> | <b>2.5</b>            | <b>0.0020146</b>   |
| miR-140-3p        | 2.4                   | 1.579E-37          |
| miR-199-5p        | 2.4                   | 5.453E-06          |
| <b>miR-30b-5p</b> | <b>2.4</b>            | <b>0.0014809</b>   |
| miR-29a-3p        | 2.3                   | 0.0165375          |
| miR-142-5p        | 2.3                   | 2.285E-21          |
| miR-122-5p        | 2.2                   | 4.38E-207          |
| miR-130b-3p       | 2.1                   | 0.0461745          |
| miR-101-3p        | 2.1                   | 1.257E-16          |

Note: miRNA with binding sites at the 3'UTR of *ELOVL5* are in bold. L20/L30, miRNA expression level (Tpm) of 20 and 30-week-old Lushi chicken. FDR, False Discovery Rate.

**Table S2.** List of cloning and qPCR primers used in the present study.

| Gene name              | Primer sequences(5'-3')                  | Product size (bp) | Tann (°C) | Purpose |
|------------------------|------------------------------------------|-------------------|-----------|---------|
| <i>ELOVL5-F</i>        | ATTGGGTGCCTTGTGGTCA                      | 180               | 60        | qPCR    |
| <i>ELOVL5-R</i>        | AGCTGGTCTGGAAGATTGTCA                    |                   |           |         |
| <i>APVLDLII-F</i>      | CAATGAAACGGCTAGACTCA                     | 108               | 60        | qPCR    |
| <i>APVLDLII-R</i>      | AACACCGACTTTTCTTCCAA                     |                   |           |         |
| <i>SLIT2-F</i>         | CGTCTGGCAAACAAAAGGAT                     | 191               | 60        | qPCR    |
| <i>SLIT2-R</i>         | CTGTGGGATGTGATCAGGAA                     |                   |           |         |
| <i>β-actin-F</i>       | GGACACCAAGCTCAGAGACT                     | 112               | 60        | qPCR    |
| <i>β-actin-R</i>       | GGACACCAAGCTCAGAGACT                     |                   |           |         |
| <i>Pre-miR-218-1-F</i> | CCGCTCGAGTCCCTCACTGTTACCCTTGG            | 174               | 60        | Cloning |
| <i>Pre-miR-218-1-R</i> | TGCTCTAGATGACTTAAGCCTCAGCAGCA            |                   |           |         |
| <i>ELOVL5-F</i>        | CCGCTCGAGTGCCTGAAAGACCAAACTGA            | 230               | 59        | Cloning |
| <i>ELOVL5-R</i>        | ATTGCGGCCGCGGTCAGTGACAGCCCAGAAT          |                   |           |         |
| <i>ELOVL5-Fm</i>       | ACAAAATCATCTGATTGTAAATAAGAGTTGTGCACTAATA | 230               | 59        | Cloning |
| <i>ELOVL5-Rm</i>       | TATTAGTGCACAACTCTTATTACAATCAGATGATTTTGT  |                   |           |         |

Note: F, forward primer for qPCR; R, reverse primer for qPCR and cloning. Fm, forward primer for cloning mut vector; Rm, reverse primer for cloning mut vector. Tann, annealing temperature for PCR program.
